# Supplementary material for: Whole Teflon valves for handling droplets
Source: Royal Society of Chemistry journal article supplement (doi:10.1039/c6lc00375c), 2016-01-01
Supplement: c6lc00375c1.pdf [file c6lc00375c1.pdf]

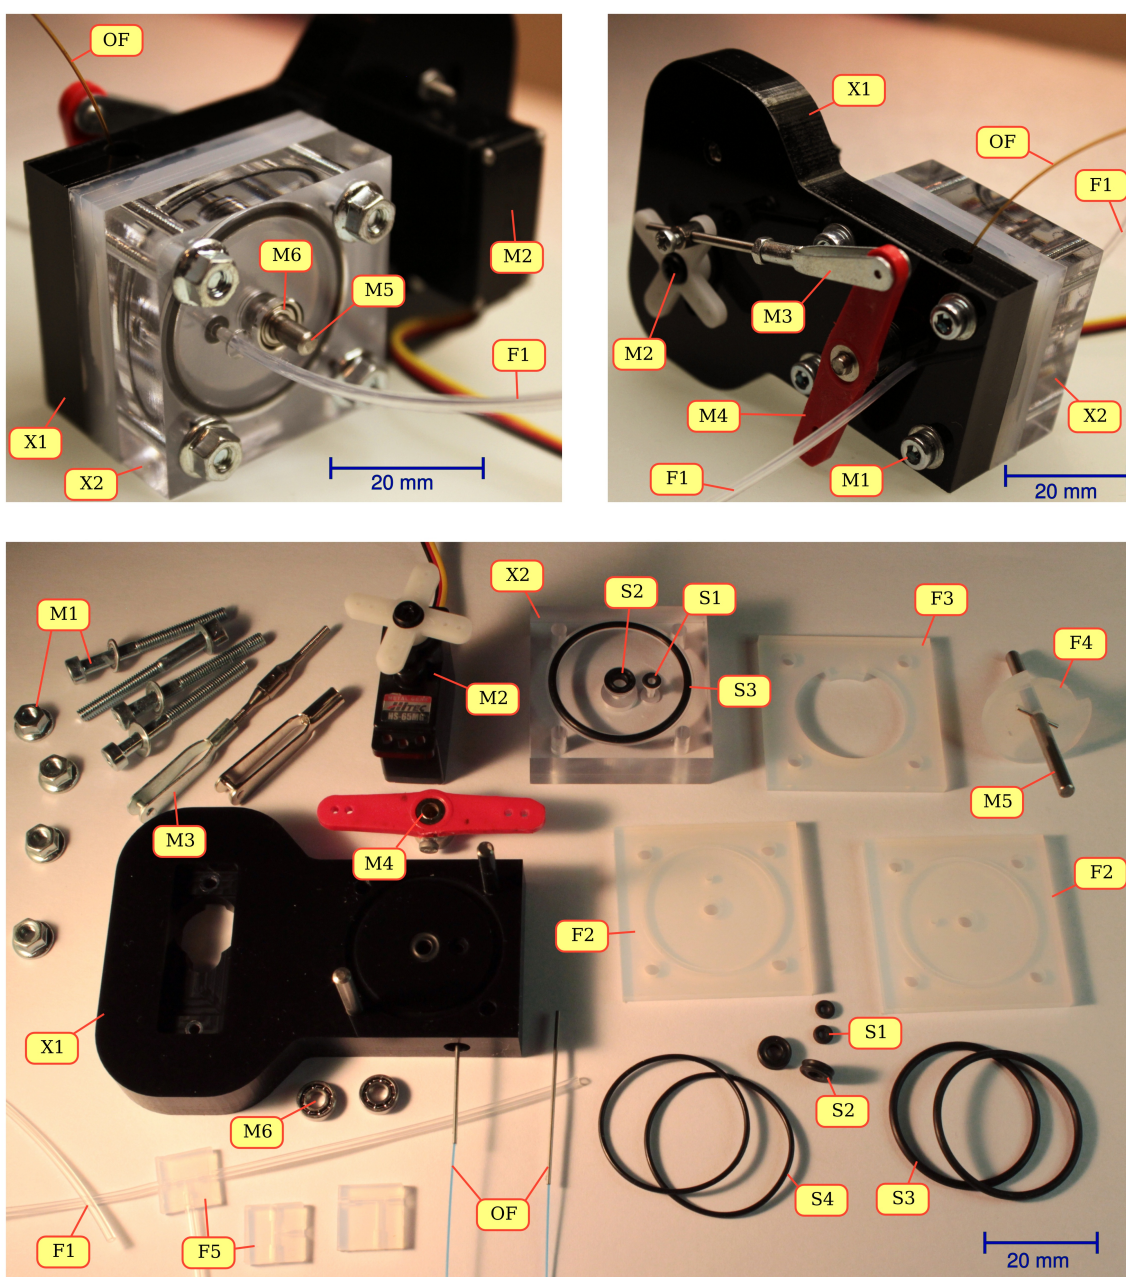

**Mechanical parts and drive transmission:** M1–mounting screws, M2–servo motor, M3–pusher rods, M4–rotary arm, M5–shaft, M6–ball bearing

**Sealing elements:** S1–small O-ring, S2–quad-ring (X-ring), S3–S4–large O-rings

**Components made of FEP:** F1–tubing, F2–internal covers, F3–spacer, F4–rotary disk, F5–modular T-junction (not a part of the valve)

**Housing / external covers:** X1–nontransparent cover with housing of the servo motor and fiber ports, X2–transparent cover

**Sensors:** OF–optical fibers glued into segments of steel tubing (hypodermic needles).
